# Supplementary material for: A Macroscale Hydrogeological Numerical Model of the Suio Hydrothermal System (Central Italy)
Source: Hindawi journal article supplement (doi:10.1155/2019/5485068), 2019-05-16
Supplement: f1 [file 5485068.f1.docx]

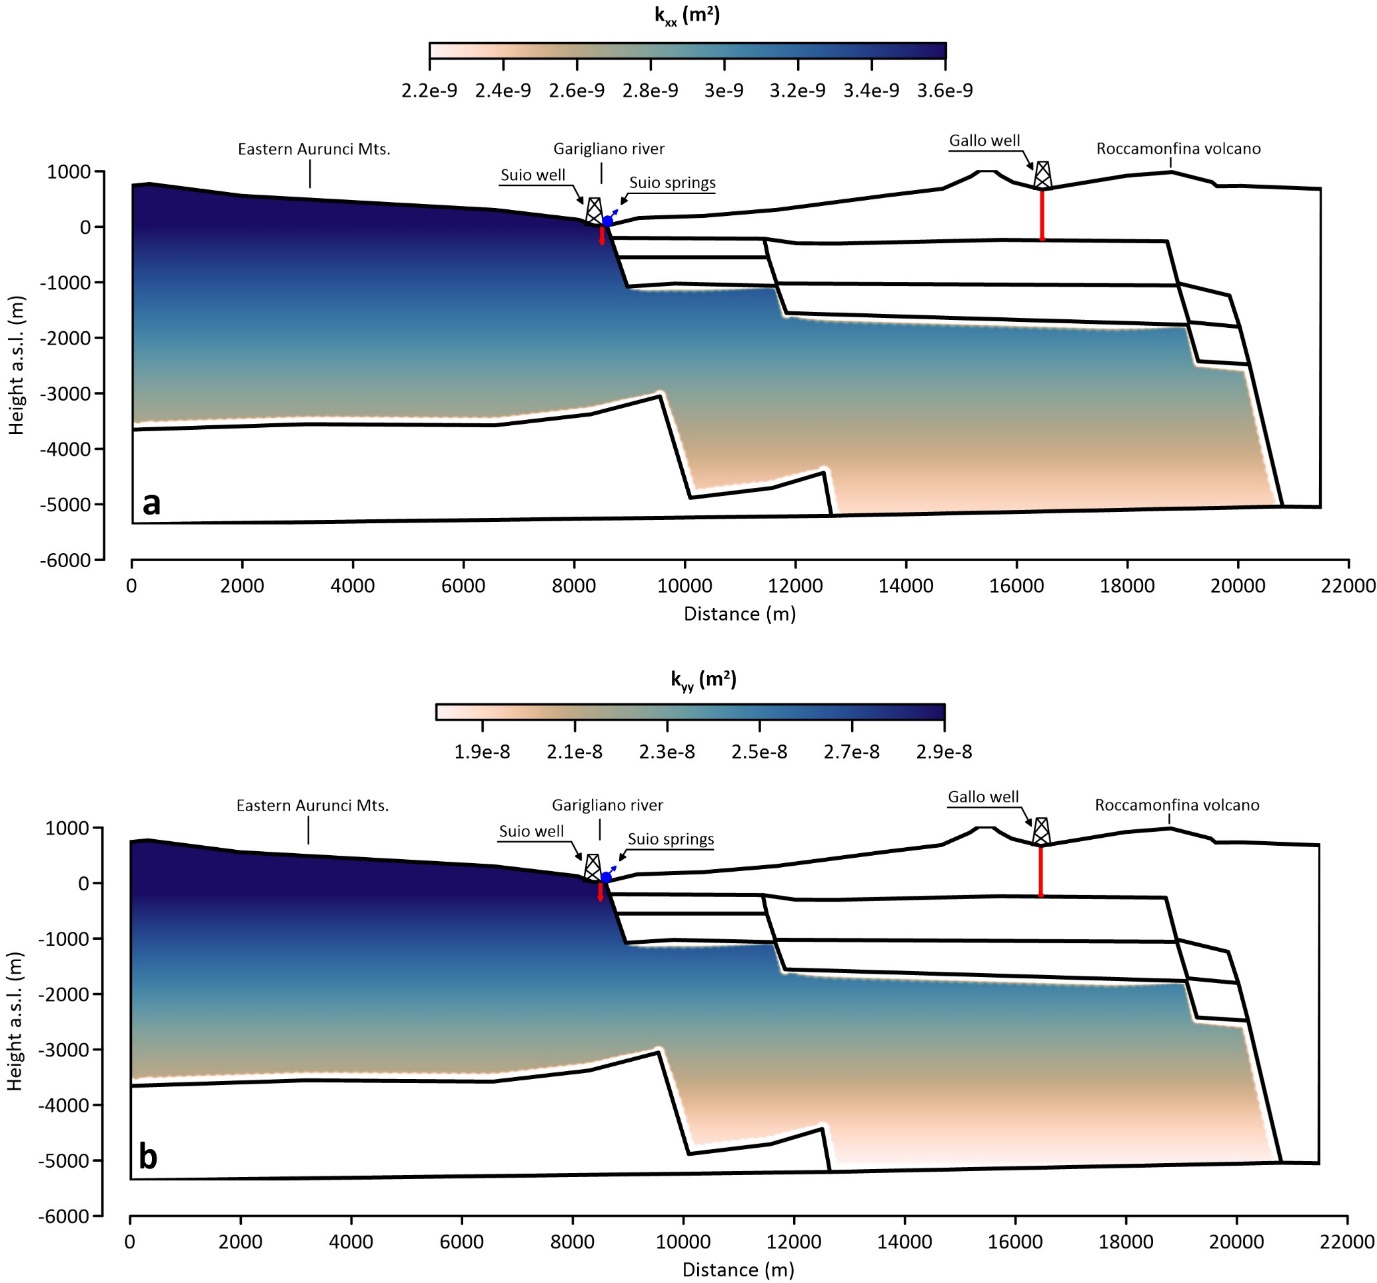


Figure S1: Assumed permeability distribution inside the CC complex. The other complexes have an isotropic permeability of 1x10-12 m2. a) Horizontal permeability (xx); b) vertical permeability (yy).


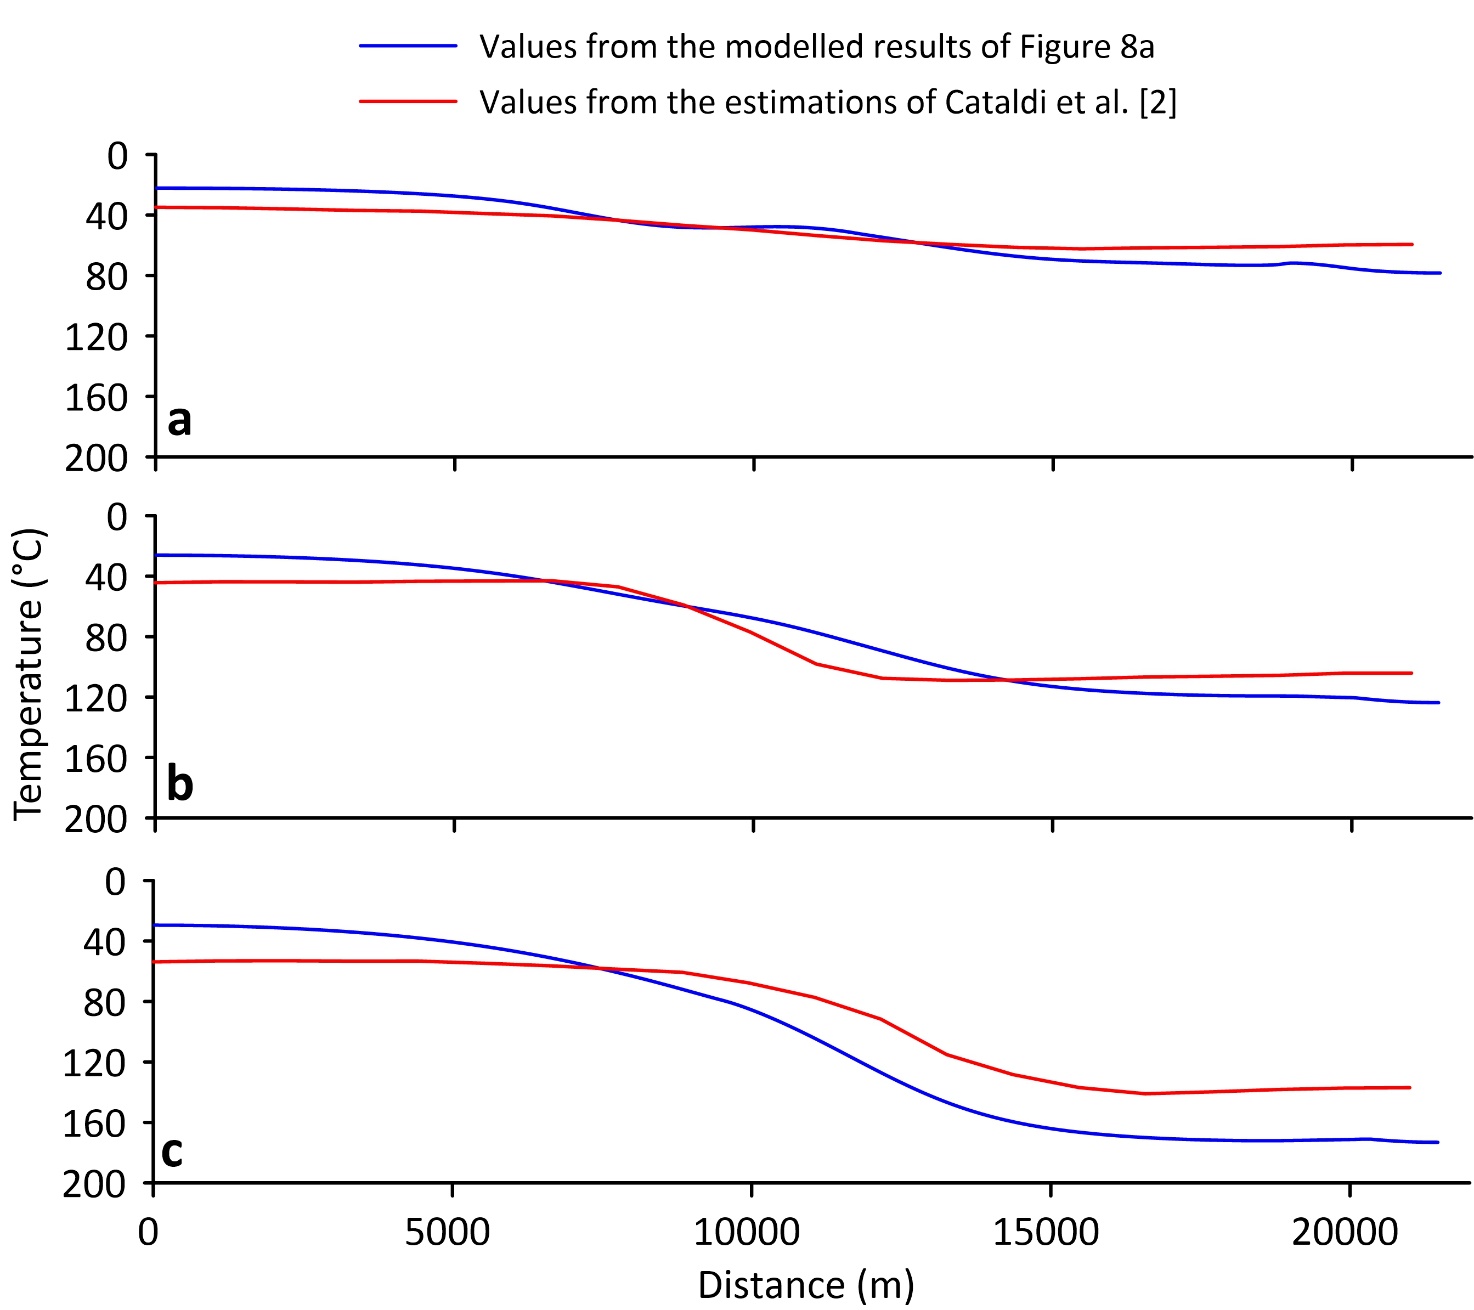


Figure S2: Comparison between the modelled temperatures of Figure 8a and the values estimated at 1000 (a), 2000 (b) and 3000 (c) meters below the sea level by Cataldi et al. [2] (available at: https://unmig.mise.gov.it/index.php/it/dati/altre-attivita/risorse-geotermiche)
